# Supplementary material for: Sorting polyolefins with near-infrared spectroscopy: identification of optimal data analysis pipelines and machine learning classifiers
Source: Royal Society of Chemistry journal article supplement (doi:10.1039/d4dd00235k), 2024-01-01
Supplement: d4dd00235k1.pdf [file d4dd00235k1.pdf]

# Supplemental Information for Sorting Polyolefins with Near-Infrared Spectroscopy: Identification of optimal data analysis pipelines and machine learning classifiers

Bradley P. Sutliff<sup>1</sup>, Peter A. Beaucage<sup>2</sup>, Debra J. Audus<sup>1</sup>, Sara V. Orski<sup>1</sup>, and Tyler B. Martin<sup>1</sup>

<sup>1</sup>Materials Science and Engineering Division, National Institute of Standards and Technology, Gaithersburg, MD 20899, United States

<sup>2</sup>NIST Center for Neutron Research, National Institute of Standards and Technology, Gaithersburg, MD, 20899, United States

July 2024

Official contribution of the National Institute of Standards and Technology; not subject to copyright in the United States.

Table S1: Abbreviations used in this SI

| Abbreviation | Expansion                                          |
|--------------|----------------------------------------------------|
| PE           | Polyethylene                                       |
| PP           | Polypropylene                                      |
| HDPE         | High-Density Polyethylene                          |
| LDPE         | Low-Density Polyethylene                           |
| LLDPE        | Linear Low-Density Polyethylene                    |
| MDPE         | Medium-Density Polyethylene                        |
| NIR          | Near-Infrared                                      |
| PLS-DA       | Partial Least Squares Discriminant Analysis        |
| SIMCA        | Soft Independent Modelling by Class Analogy        |
| SVM/SVC      | Support Vector Machines/Support Vector Classifiers |
| KNN          | k-Nearest Neighbors                                |
| RF/RFC       | Random Forest (Classifier)                         |
| LDA          | Linear Discriminant Analysis                       |
| QDA          | Quadratic Discriminant Analysis                    |
| MLP(C)       | Multilayer Perceptron (Classifier)                 |
| RBF          | Radial Basis Function                              |
| GNB          | Gaussian Naive Bayes                               |

Table S2: Summary of the polymer state (pellet/powder) and presence of colorant for the commercial polymers. All other polymer samples were uncolored pellets.

|                  | HDPE | MDPE | LDPE | LLDPE | PP | PP-co-PE |
|------------------|------|------|------|-------|----|----------|
| Uncolored Pellet | 2    | 0    | 9    | 3     | 1  | 2        |
| Colored Pellet   | 2    | 0    | 2    | 0     | 2  | 0        |
| Uncolored Powder | 8    | 0    | 0    | 0     | 0  | 0        |
| Colored Powder   | 0    | 0    | 0    | 0     | 0  | 0        |

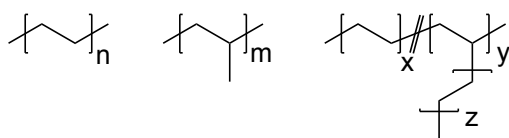

Figure S1: Reference skeletal structures of HDPE, PP, and LDPE, respectively. For LLDPE,  $z$  is less than 3.

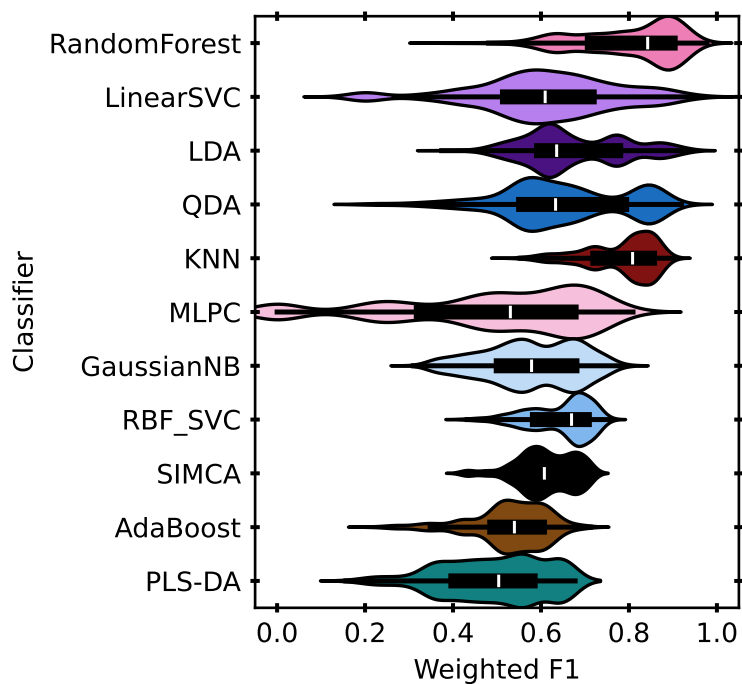

Figure S2: A violin plot showing the distribution of weighted F1 scores for each classifier. Center white dots indicate the median score, thick black boxes show the interquartile range, and black “whiskers” extend to 1.5 times the interquartile range. More details for the classifiers are provided in Tables S3 through S5, and Section 3.2 and Table 2 of the corresponding manuscript.

Table S3: Default hyperparameters and sources for the classifiers used in the initial classification study using all 1152 preprocessing pipelines. While listed values are the defaults, the arguments that were modified for the manuscript are identified in **bold**.

| Common Name | Classifier                    | Source                          | Parameters                                                                                                                                                                                                                                                           |
|-------------|-------------------------------|---------------------------------|----------------------------------------------------------------------------------------------------------------------------------------------------------------------------------------------------------------------------------------------------------------------|
| PLS-DA      | PLSRegression                 | scikit-learn 1.2                | <b>n_components=2</b><br>scale=True<br>max_iter=500<br>tol=1e-06<br>copy=True                                                                                                                                                                                        |
| LDA         | LinearDiscriminantAnalysis    | scikit-learn 1.2                | solver='svd'<br>shrinkage=None<br>priors=None<br>n_components=None<br>store_covariance=False<br>tol=0.0001<br>covariance_estimator=None                                                                                                                              |
| QDA         | QuadraticDiscriminantAnalysis | scikit-learn 1.2                | priors=None<br>reg_param=0.0<br>store_covariance=False<br>tol=0.0001                                                                                                                                                                                                 |
| LinearSVC   | svm.LinearSVC                 | scikit-learn 1.2                | penalty='l2'<br>loss='squared_hinge'<br>dual=True<br>tol=0.0001<br>C=1.0<br>multi_class='ovr'<br>fit_intercept=True<br>intercept_scaling=1<br>class_weight=None<br>verbose=0<br>random_state=None<br>max_iter=1000                                                   |
| RBF_SVC     | svm.SVC                       | scikit-learn 1.2                | C=1.0<br>kernel='rbf'<br>degree=3<br>gamma='scale'<br>coef0=0.0<br>shrinking=True<br>probability=False<br>tol=0.001<br>cache_size=200<br>class_weight=None<br>verbose=False<br>max_iter=-1<br>decision_function_shape='ovr'<br>break_ties=False<br>random_state=None |
| SIMCA       | SIMCA_classifier              | custom code adapted from [1, 2] | n_components=3<br>alpha=0.05<br>simca_type='SIMCA'                                                                                                                                                                                                                   |

Table S4: Continuation of the default hyperparameters and sources for the classifiers used in the initial classification study using all 1152 preprocessing pipelines. While listed values are the defaults, the arguments that were modified for the manuscript are identified in **bold**.

| Common Name  | Classifier             | Source           | Parameters                                                                                                                                                                                                                                                                                                                                                                                                                                                                      |
|--------------|------------------------|------------------|---------------------------------------------------------------------------------------------------------------------------------------------------------------------------------------------------------------------------------------------------------------------------------------------------------------------------------------------------------------------------------------------------------------------------------------------------------------------------------|
| KNN          | KNeighborsClassifier   | scikit-learn 1.2 | n_neighbors=5<br>weights='uniform'<br>algorithm='auto'<br>leaf_size=30<br>p=2<br>metric='minkowski'<br>metric_params=None<br>n_jobs=None                                                                                                                                                                                                                                                                                                                                        |
| GaussianNB   | GaussianNB             | scikit-learn 1.2 | priors=None<br>var_smoothing=1e-09                                                                                                                                                                                                                                                                                                                                                                                                                                              |
| MLPC         | MLPClassifier          | scikit-learn 1.2 | <b>max_iter=200</b><br>hidden_layer_sizes=(100,)<br>activation='relu'<br>solver='adam'<br>alpha=0.0001<br>batch_size='auto'<br>learning_rate='constant'<br>learning_rate_init=0.001<br>power_t=0.5<br>shuffle=True<br>random_state=None<br>tol=0.0001<br>verbose=False<br>warm_start=False<br>momentum=0.9<br>nesterovs_momentum=True<br>early_stopping=False<br>validation_fraction=0.1<br>beta_1=0.9<br>beta_2=0.999<br>epsilon=1e-08<br>n_iter_no_change=10<br>max_fun=15000 |
| RandomForest | RandomForestClassifier | scikit-learn 1.2 | n_estimators=100<br>criterion='gini'<br>max_depth=None<br>min_samples_split=2<br>min_samples_leaf=1<br>min_weight_fraction_leaf=0.0<br>max_features='sqrt'<br>max_leaf_nodes=None<br>min_impurity_decrease=0.0<br>bootstrap=True<br>oob_score=False<br>n_jobs=None<br>random_state=None<br>verbose=0<br>warm_start=False<br>class_weight=None<br>ccp_alpha=0.0<br>max_samples=Non                                                                                               |

Table S5: Continuation of the default hyperparameters and sources for the classifiers used in the initial classification study using all 1152 preprocessing pipelines. While listed values are the defaults, the arguments that were modified for the manuscript are identified in **bold**.

| Common Name | Classifier         | Source           | Parameters                                                                                                                        |
|-------------|--------------------|------------------|-----------------------------------------------------------------------------------------------------------------------------------|
| AdaBoost    | AdaBoostClassifier | scikit-learn 1.2 | estimator=None<br>n_estimators=50<br>learning_rate=1.0<br>algorithm='SAMME.R'<br>random_state=None<br>base_estimator='deprecated' |
